# Supplementary material for: The role of conjugated side chains in high performance photovoltaic polymers
Source: Royal Society of Chemistry journal article supplement (doi:10.1039/c4ta05445h), 2014-12-02
Supplement: c4ta05445h1.pdf [file c4ta05445h1.pdf]

# The Role of Conjugated Side Chains in High Performance Photovoltaic Polymers

*Meng Wang*<sup>1,2</sup>, *Di Ma*<sup>1</sup>, *Keli Shi*<sup>1,3</sup>, *Shaowei Shi*<sup>1</sup>, *Song Chen*<sup>4</sup>, *Changjiang Huang*<sup>1</sup>, *Zi Qiao*<sup>1</sup>, *Zhi-Guo Zhang*<sup>3</sup>, *Yongfang Li*<sup>3\*</sup>, *Xiaoyu Li*<sup>1\*</sup>, and *Haiqiao Wang*<sup>1,2\*</sup>

1. State Key Laboratory of Organic-Inorganic Composite, Beijing University of Chemical Technology, Beijing 100029, China
2. Key Laboratory of Carbon Fiber and Functional Polymers, Ministry of Education, Beijing University of Chemical Technology, Beijing 100029, China
3. Beijing National Laboratory for Molecular Sciences, Institute of Chemistry, Chinese Academy of Sciences, Beijing 100190, China
4. China Textile Academy, Beijing, 100025, China

## **Contents:**

- |                                                  |                      |
|--------------------------------------------------|----------------------|
| 1. DSC thermograms of polymer.                   | Figure S1            |
| 2. Electrochemical Curve.                        | Figure S2            |
| 3. Density functional theory (DFT) calculations. | Figure S3/ Figure S4 |
| 4. Photovoltaic Properties.                      | Table S1/ Figure S5  |
| 5. Absorption spectra of blend films             | Figure S6            |
| 6. XRD patterns                                  | Figure S7            |

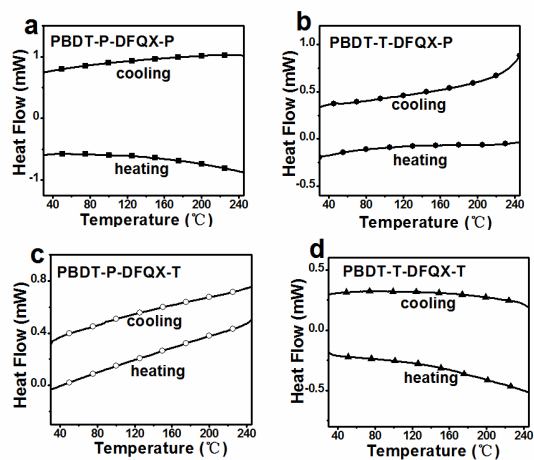

**Figure S1.** The differential scanning calorimetry (DSC) the thermograms of polymers under the protection of nitrogen (heating and cooling rate: 10 °C/ min)

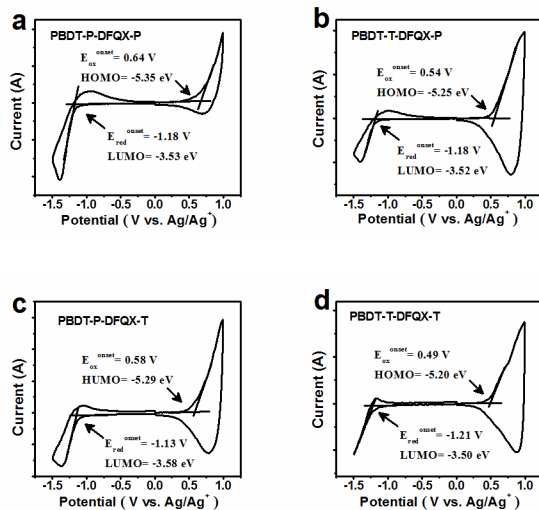

**Figure S2.** Thin film cyclic voltammograms of polymers in 0.1 M Bu<sub>4</sub>NPF<sub>6</sub> acetonitrile solution at a scan rate of 100 mV · s<sup>-1</sup>.

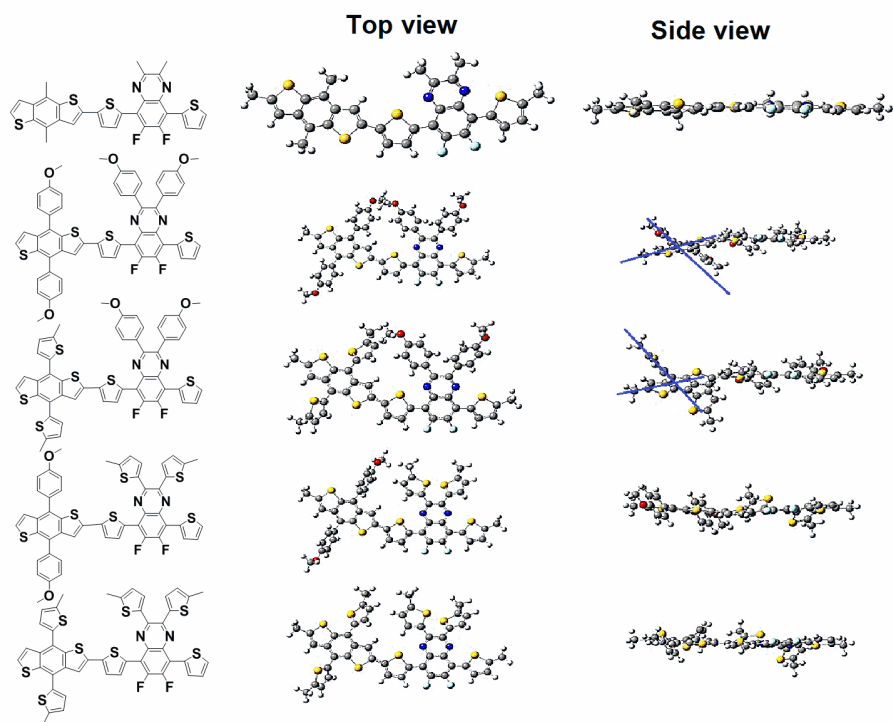

**Figure S3.** Top view and side view of optimized geometries of the four copolymers backbone units with a chain length  $n=1$ .

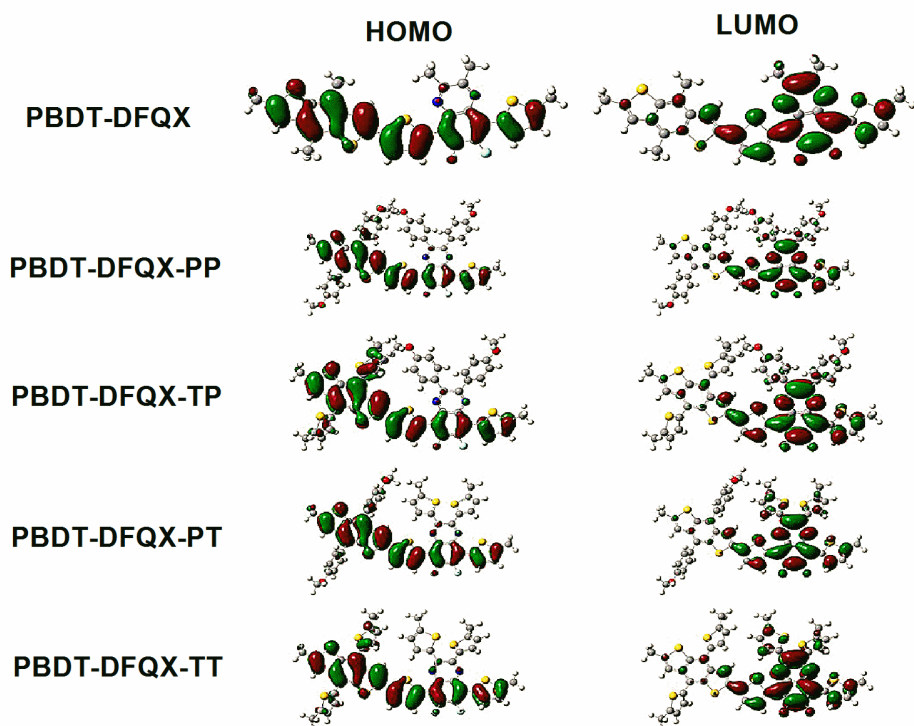

**Figure S4.** The frontier molecular orbital (LUMO, top; HOMO, bottom) obtained from DFT calculations on the polymers with a chain length  $n=1$ .

**Table S1.** The detailed photovoltaic data of the optimization process of the PSCs

| Polymer      | Ratio <sup>a</sup> | Treatment          | $V_{oc}$ (V) | $J_{sc}$ (mA/cm <sup>2</sup> ) | FF (%) | PCE (%) | Thickness (nm) |
|--------------|--------------------|--------------------|--------------|--------------------------------|--------|---------|----------------|
| PBDD-DFQX-PP | 1:1                | None               | 0.89         | 6.04                           | 54.87  | 2.95    | 97             |
|              | 1:2                | None               | 0.80         | 8.11                           | 45.60  | 2.96    | 83             |
|              | 1:3                | None               | 0.81         | 8.67                           | 38.04  | 2.67    | 75             |
|              | 1:2                | 3%DIO              | 0.86         | 7.63                           | 43.47  | 2.85    | 79             |
|              | 1:2                | 3% CN              | 0.87         | 7.89                           | 34.80  | 2.39    | 77             |
|              | 1:2                | CH <sub>3</sub> OH | 0.89         | 8.66                           | 51.38  | 3.96    | 87             |
| PBDD-DFQX-TP | 1:1                | None               | 0.82         | 12.34                          | 60.12  | 6.08    | 95             |
|              | 1:2                | None               | 0.84         | 10.68                          | 55.94  | 5.02    | 67             |
|              | 1:3                | None               | 0.82         | 7.60                           | 39.99  | 2.49    | 49             |
|              | 1:1                | 3%DIO              | 0.78         | 10.42                          | 54.36  | 4.42    | 88             |
|              | 1:1                | 3% CN              | 0.80         | 9.46                           | 49.87  | 3.77    | 84             |
|              | 1:1                | CH <sub>3</sub> OH | 0.87         | 11.31                          | 60.44  | 5.95    | 91             |
| PBDD-DFQX-PT | 1:1                | None               | 0.85         | 12.13                          | 63.46  | 6.54    | 76             |
|              | 1:2                | None               | 0.85         | 10.87                          | 60.91  | 5.63    | 58             |
|              | 1:3                | None               | 0.79         | 5.97                           | 59.25  | 2.73    | 64             |
|              | 1:1                | 3%DIO              | 0.78         | 12.06                          | 59.30  | 5.58    | 82             |
|              | 1:1                | 3% CN              | 0.84         | 9.95                           | 63.13  | 5.28    | 78             |
|              | 1:1                | CH <sub>3</sub> OH | 0.84         | 11.51                          | 63.28  | 6.11    | 87             |
| PBDD-DFQX-TT | 1:1                | None               | 0.79         | 13.11                          | 69.15  | 7.16    | 85             |
|              | 1:1.2              | None               | 0.85         | 12.53                          | 68.51  | 7.29    | 98             |
|              | 1:1.5              | None               | 0.83         | 12.67                          | 67.63  | 7.11    | 92             |
|              | 1:2                | None               | 0.83         | 11.92                          | 69.92  | 6.92    | 72             |
|              | 1:3                | None               | 0.81         | 10.05                          | 69.07  | 5.62    | 61             |
|              | 1:1.2              | 3%DIO              | 0.78         | 12.33                          | 69.44  | 6.68    | 80             |
|              | 1:1.2              | 3% CN              | 0.84         | 12.31                          | 65.96  | 6.82    | 86             |
|              | 1:1                | CH <sub>3</sub> OH | 0.86         | 13.95                          | 62.18  | 7.46    | 81             |
|              | 1:1.2              | CH <sub>3</sub> OH | 0.86         | 12.77                          | 69.93  | 7.68    | 95             |
|              | 1:1.5              | CH <sub>3</sub> OH | 0.83         | 12.60                          | 70.79  | 7.41    | 101            |

[a] Polymer/PC<sub>71</sub>BM weight ratio.

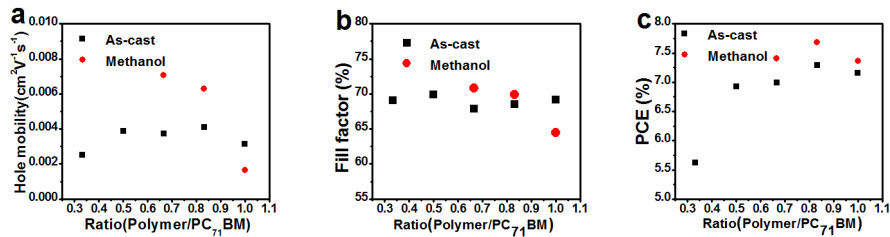

**Figure S5.** Photovoltaic properties of PBDD-DFQX-TT-based PSCs under different processing conditions

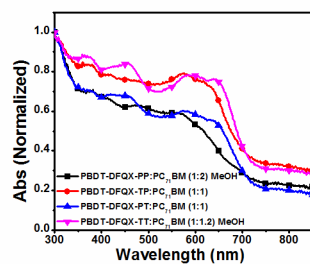

**Figure S6.** UV/Vis absorption spectra of blend films under the optimal conditions.

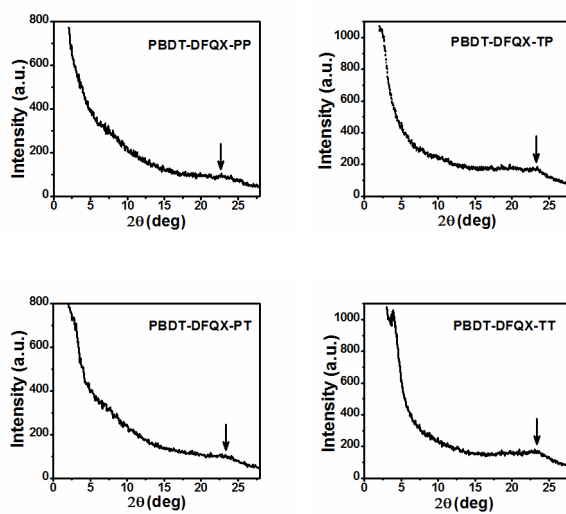

**Figure S7.** XRD patterns of the pristine polymer films.
